# Supplementary material for: The Effect of Oral Iron Supplementation/Fortification on the Gut Microbiota in Infancy: A Systematic Review and Meta-Analysis
Source: MDPI journal article supplement (doi:10.3390/children11020231), 2024-02-10
Supplement: s1 [file s1]

**Table S1.** Data on the microbiome from included studies

| First Author | Year | Nutrition   | Group   | Participants | Species        | Before     | After                 | Change  | Change SD |
|--------------|------|-------------|---------|--------------|----------------|------------|-----------------------|---------|-----------|
| Tang         | 2017 | MNP+Fe      | Iron    | 13           | Bifidobacteria | 17.3±11.1% | -6.38±2.5%, p = 0.02  | -6.38%  | 2.50%     |
| Tang         | 2017 | MNP+Fe      | Iron    | 13           | Escherichia    | 30.1%±23%  | -6.23±9%, p = 0.41    | -6.23%  | 9.00%     |
| Tang         | 2017 | MNP only    | No iron | 13           | Bifidobacteria | 17.3±11.1% | -4.27±5%, p = 0.4445  | -4.27%  | 5.00%     |
| Tang         | 2017 | MNP only    | No iron | 13           | Escherichia    | 30.1%±23%  | -16.05±6.9, p = 0.05  | -16.05% | 6.90%     |
| Tang         | 2017 | Placebo     | No iron | 7            | Bifidobacteria | 17.3±11.1% | -8.05±1.46, p = 0.01  | -8.05%  | 1.46%     |
| Tang         | 2017 | Placebo     | No iron | 7            | Escherichia    | 30.1%±23%  | -19.75±4.5%, p = 0.01 | -19.75% | 4.50%     |
| Sjödin       | 2019 | High iron   | Iron    | 18           | Bifidobacteria | 78%        | 60.00%                | -18%    | 17.75%    |
| Sjödin       | 2019 | High iron   | Iron    | 18           | Lactobacillus  |            | 42.00%                |         |           |
| Sjödin       | 2019 | High iron   | Iron    | 18           | Streptococcus  |            | 0.90%                 |         |           |
| Sjödin       | 2019 | High iron   | Iron    | 18           | Clostridium    |            | 9.00%                 |         |           |
| Sjödin       | 2019 | High iron   | Iron    | 18           | Bacteroides    |            | 0.90%                 |         |           |
| Sjödin       | 2019 | Low iron    | Iron    | 18           | Bifidobacteria |            | 78.00%                |         |           |
| Sjödin       | 2019 | Low iron    | Iron    | 18           | Lactobacillus  |            | 32.00%                |         |           |
| Sjödin       | 2019 | Iron drops  | Iron    | 17           | Bifidobacteria |            | N/A                   |         |           |
| Sjödin       | 2019 | Iron drops  | Iron    | 17           | Lactobacillus  |            | 8.00%                 |         |           |
| Sjödin       | 2019 | Iron drops  | Iron    | 17           | Streptococcus  |            | 0.20%                 |         |           |
| Sjödin       | 2019 | Iron drops  | Iron    | 17           | Clostridium    |            | 25.00%                |         |           |
| Sjödin       | 2019 | Iron drops  | Iron    | 17           | Bacteroides    |            | 1.20%                 |         |           |
| Krebs        | 2013 | Fe          | Iron    | 4            | Bifidobacteria |            |                       | -15%    | 34.99%    |
| Krebs        | 2013 | Fe          | Iron    | 4            | Lactobacillus  |            |                       | -15%    | 34.99%    |
| Krebs        | 2013 | Fe+Zn       |         | 6            | Bifidobacteria |            |                       | 0%      | 0.80%     |
| Krebs        | 2013 | Fe+Zn       |         | 6            | Lactobacillus  |            |                       | 0%      | 0.80%     |
| Krebs        | 2013 | Meat        | No iron | 4            | Bifidobacteria |            |                       | 0%      | 1.00%     |
| Krebs        | 2013 | Meat        | No iron | 4            | Lactobacillus  |            |                       | 0%      | 1.00%     |
| Qasem        | 2017 | Fe          | Iron    | 18           | Bifidobacteria | 50%        | 37.30%                | -13%    | 15.54%    |
| Qasem        | 2017 | Fe          | Iron    | 18           | Lactobacillus  | 0.20%      | 0.50%                 | 0%      | 0.46%     |
| Qasem        | 2017 | Fe + fruits | Iron    | 19           | Bifidobacteria | 58.60%     | 50.40%                | -8%     | 12.20%    |
| Qasem        | 2017 | Fe + fruits | Iron    | 19           | Lactobacillus  | 0.50%      | 0.40%                 | 0%      | 0.45%     |
| Qasem        | 2017 | Meat        | No iron | 19           | Bifidobacteria | 41%        | 41.70%                | 1%      | 4.47%     |
| Qasem        | 2017 | Meat        | No iron | 19           | Lactobacillus  | 0.20%      | 0.10%                 | 0%      | 0.45%     |

SD: Standard Deviation, Before: measure of the species before intervention, After: measure of the species after intervention
